# Supplementary material for: The Neuroprotective Mechanism of Low-Frequency rTMS on Nigral Dopaminergic Neurons of Parkinson’s Disease Model Mice
Source: Hindawi journal article supplement (doi:10.1155/2015/564095), 2015-01-01
Supplement: f1 [file 564095.f1.pdf]

**Table S1 Raw data of automated locomotor activity test.**

| Group  | Day         |             |               |              |             |
|--------|-------------|-------------|---------------|--------------|-------------|
|        | Before      | 1D          | 3D            | 7D           | 14D         |
| NS     | 131.7 ± 6.7 | 132.6 ± 6.1 | 130.6 ± 6.9   | 132.8 ± 7.2  | 130.4 ± 7.5 |
| PD     | 133.6 ± 6.2 | 78.1 ± 8.0* | 127.7 ± 8.1*  | 127.7 ± 10.6 | 128.9 ± 7.6 |
| s-rTMS | 129.6 ± 6.9 | 77.1 ± 7.1* | 129.4 ± 10.7* | 130.0 ± 10.0 | 128.2 ± 8.5 |
| rTMS   | 132.2 ± 7.1 | 80.5 ± 6.6* | 125.5 ± 8.6*  | 127.0 ± 9.8  | 128.4 ± 9.7 |

\*, significantly different from NS group,  $P < 0.01$

**Table S2 Raw data of rotary number.**

| Group  | Day        |             |             |                          |                          |
|--------|------------|-------------|-------------|--------------------------|--------------------------|
|        | Before     | 1D          | 3D          | 7D                       | 14D                      |
| NS     | 91.4 ± 3.9 | 92.5 ± 3.6  | 93.1 ± 3.7  | 93.3 ± 4.2               | 93.2 ± 3.8               |
| PD     | 91.5 ± 5.0 | 43.1 ± 5.5* | 60.8 ± 4.4* | 68.6 ± 5.4* <sup>#</sup> | 73.1 ± 4.7* <sup>#</sup> |
| s-rTMS | 90.3 ± 4.4 | 41.4 ± 4.4* | 62.5 ± 4.0* | 66.1 ± 4.5* <sup>#</sup> | 70.7 ± 5.2* <sup>#</sup> |
| rTMS   | 91.1 ± 4.3 | 41.2 ± 6.0* | 64.6 ± 5.5* | 80.5 ± 4.6*              | 85.9 ± 3.7*              |

\*, significantly different from NS group,  $P < 0.05$ ; <sup>#</sup>, significantly different from rTMS group,  $P < 0.05$

**Table S3 Raw data of RMT value**

| Group  | Day            |                  |                  |                       |                       |
|--------|----------------|------------------|------------------|-----------------------|-----------------------|
|        | Before         | 1D               | 3D               | 7D                    | 14D                   |
| NS     | $25.1 \pm 1.7$ | $25.0 \pm 1.5$   | $25.6 \pm 2.2$   | $25.0 \pm 2.0$        | $25.5 \pm 1.8$        |
| PD     | $25.1 \pm 2.0$ | $22.4 \pm 1.4^*$ | $21.9 \pm 1.7^*$ | $21.4 \pm 1.9^{* \#}$ | $21.3 \pm 1.4^{* \#}$ |
| s-rTMS | $25.0 \pm 2.0$ | $21.9 \pm 1.4^*$ | $21.3 \pm 1.5^*$ | $21.0 \pm 2.3^{* \#}$ | $20.9 \pm 1.8^{* \#}$ |
| rTMS   | $24.9 \pm 2.0$ | $21.8 \pm 2.0^*$ | $22.9 \pm 2.2^*$ | $23.5 \pm 1.5^*$      | $23.9 \pm 1.6^*$      |

\*, significantly different from NS group,  $P < 0.05$ ; #, significantly different from rTMS group,  $P < 0.05$

**Table S4 Raw data of HPLC-ECD detection**

| Group  | DA (nM/L)                | HVA (nM/L)                | DOPAC (nM/L)              |
|--------|--------------------------|---------------------------|---------------------------|
| NS     | 515.4±90.0               | 809.9±121.9               | 1180.1±641.2              |
| PD     | 151.3±38.5* <sup>#</sup> | 593.3±36.45* <sup>#</sup> | 409.0±275.6* <sup>#</sup> |
| s-rTMS | 186.0±40.7* <sup>#</sup> | 622.39±51.0* <sup>#</sup> | 386.8±193.0* <sup>#</sup> |
| rTMS   | 258.2±50.4*              | 711.9±54.0*               | 936.8±373.6*              |

\*, significantly different from NS group,  $P < 0.05$ ; <sup>#</sup>, significantly different from rTMS group,  $P < 0.05$

**Table S5 Raw data of COD values in immunohistochemical staining.**

| Group  | TH                    | BDNF                  | GDNF                  |
|--------|-----------------------|-----------------------|-----------------------|
| NS     | $0.33 \pm 0.04$       | $0.32 \pm 0.02$       | $0.42 \pm 0.03$       |
| PD     | $0.22 \pm 0.02^{*\#}$ | $0.28 \pm 0.02^{*\#}$ | $0.34 \pm 0.03^{*\#}$ |
| s-rTMS | $0.23 \pm 0.03^{*\#}$ | $0.28 \pm 0.02^{*\#}$ | $0.34 \pm 0.04^{*\#}$ |
| rTMS   | $0.28 \pm 0.03^*$     | $0.31 \pm 0.02^*$     | $0.38 \pm 0.03^*$     |

\*, significantly different from NS group,  $P < 0.05$ ; #, significantly different from rTMS group,  $P < 0.05$

**Table S6 Raw data of COD values in western blot.**

| Group  | TH                     | BDNF-homodimer         | BDNF-monomer           | GDNF                   |
|--------|------------------------|------------------------|------------------------|------------------------|
| NS     | $0.84 \pm 0.08$        | $0.97 \pm 0.07$        | $0.99 \pm 0.07$        | $0.87 \pm 0.07$        |
| PD     | $0.69 \pm 0.07^{* \#}$ | $0.82 \pm 0.04^{* \#}$ | $0.82 \pm 0.04^{* \#}$ | $0.70 \pm 0.10^{* \#}$ |
| s-rTMS | $0.70 \pm 0.10^{* \#}$ | $0.79 \pm 0.06^{* \#}$ | $0.79 \pm 0.06^{* \#}$ | $0.68 \pm 0.13^{* \#}$ |
| rTMS   | $0.81 \pm 0.07^{*}$    | $0.91 \pm 0.10^{*}$    | $0.91 \pm 0.10^{*}$    | $0.84 \pm 0.09^{*}$    |

\*, significantly different from NS group,  $P < 0.05$ ; #, significantly different from rTMS group,  $P < 0.05$
